# Supplementary material for: Neuroprotective role of Hippo signaling by microtubule stability control in Caenorhabditis elegans
Source: eLife. 2025 Apr 3;13:RP102001. doi: 10.7554/eLife.102001 (PMC11968107; doi:10.7554/eLife.102001)
Supplement: Figure 1—figure supplement 1—source data 1. [file elife-102001-fig1-figsupp1-data1.xlsx]

## Sheet: Figure 1-figure supplement 1D
	defective neurons (%)								mean of defective neurons (%)			SEM
	WT	WT	WT	wts-1	wts-1	wts-1			WT	wts-1		WT	wts-1
AVM L1								AVM L1
AVM L2	0	0	0	16.6667	20	20		AVM L2	0	18.8889		0	1.1111
AVM L3	3.33333	6.66667	0	26.6667	30	30		AVM L3	3.33333	28.8889		1.9245	1.11111
AVM L4	3.33333	0	0	40	36.6667	40		AVM L4	1.11111	38.8889		1.11111	1.1111
AVM 1DA	0	0	0	76.6667	70	60		AVM 1DA	0	68.8889		0	4.84322
PVM L1								PVM L1
PVM L2	0	0	3.33333	20	16.6667	20		PVM L2	1.11111	18.8889		1.11111	1.1111
PVM L3	0	0	0	26.6667	20	36.6667		PVM L3	0	27.7778		0	4.84323
PVM L4	0	0	0	46.6667	43.3333	46.6667		PVM L4	0	45.5556		0	1.11113
PVM 1DA	0	6.66667	0	73.3333	73.3333	66.6667		PVM 1DA	2.22222	71.1111		2.22222	2.22222

## Sheet: Figure 1-figure supplement 1E
swelling neurons (%) in wts-1 mutant at each stage												mean percentage of swelling neurons in wts-1 mutant at each stage		SEM
ALM_L1	ALM_L2	ALM_L3	ALM_L4	ALM_1DA	PLM_L1	PLM_L2	PLM_L3	PLM_L4	PLM_1DA		ALM_L1	3.33333		0
3.33333	33.3333	76.6667	96.6667	100	6.66667	43.3333	73.3333	70	93.3333		ALM_L2	32.2222		6.75862
3.33333	20	63.3333	96.6667	100	10	40	86.6667	80	93.3333		ALM_L3	70		3.849
3.33333	43.3333	70	96.6667	100	6.66667	33.3333	80	86.6667	90		ALM_L4	96.6667		0
											ALM_1DA	100		0
											PLM_L1	7.77778		1.11111
											PLM_L2	38.8889		2.93972
											PLM_L3	80		3.849
											PLM_L4	78.8889		4.84322
											PLM_1DA	92.2222		1.11111

## Sheet: Figure 1-figure supplement 1F
Neurons with branching (%) in wts-1 mutant												mean percentage of neurons with branching in wts-1 mutant		SEM
ALM_L1	ALM_L2	ALM_L3	ALM_L4	ALM_1DA	PLM_L1	PLM_L2	PLM_L3	PLM_L4	PLM_1DA		ALM_L1	1.11111		1.11111
0	0	30	43.3333	100	3.33333	10	6.66667	30	63.3333		ALM_L2	7.77778		4.00617
0	10	10	46.6667	100	0	6.66667	10	26.6667	63.3333		ALM_L3	27.7778		9.68644
3.33333	13.3333	43.3333	60	100	3.33333	0	16.6667	20	50		ALM_L4	50		5.09175
											ALM_1DA	100		0
											PLM_L1	2.22222		1.11111
											PLM_L2	5.55556		2.93972
											PLM_L3	11.1111		2.93972
											PLM_L4	25.5556		2.93972
											PLM_1DA	58.8889		4.44444

## Sheet: Figure 1-figure supplement 1G
Neurons with somatic outgrowth (%) in wts-1 mutant												mean percentage of Neurons with somatic outgrowth in wts-1 mutant		SEM
ALM_L1	ALM_L2	ALM_L3	ALM_L4	ALM_1DA	PLM_L1	PLM_L2	PLM_L3	PLM_L4	PLM_1DA		ALM_L1	0		0
0	0	3.33333	3.33333	23.3333	0	0	0	10	10		ALM_L2	0		0
0	0	0	0	20	0	0	0	3.33333	10		ALM_L3	2.22222		1.11111
0	0	3.33333	0	16.6667	0	0	0	6.66667	13.3333		ALM_L4	1.11111		1.11111
											ALM_1DA	20		1.9245
											PLM_L1	0		0
											PLM_L2	0		0
											PLM_L3	0		0
											PLM_L4	6.66667		1.9245
											PLM_1DA	11.1111		1.11111

## Sheet: Figure 1-figure supplement 1H
Neurons with extended process (%) in wts-1 mutant												mean percentage of neurons with extended process (%) in wts-1 mutant		SEM
ALM_L1	ALM_L2	ALM_L3	ALM_L4	ALM_1DA	PLM_L1	PLM_L2	PLM_L3	PLM_L4	PLM_1DA		ALM_L1	0		0
0	0	0	10	20	0	0	0	6.66667	16.6667		ALM_L2	2.22222		1.11111
0	3.33333	0	10	20	0	0	6.66667	10	23.3333		ALM_L3	0		0
0	3.33333	0	13.3333	16.6667	0	0	0	10	30		ALM_L4	11.1111		1.11111
											ALM_1DA	18.8889		1.11111
											PLM_L1	0		0
											PLM_L2	0		0
											PLM_L3	2.22222		2.22222
											PLM_L4	8.88889		1.11111
											PLM_1DA	23.3333		3.849

## Sheet: Figure 1-figure supplement 1I
# 0f swelling per neuron
ALM_L1	ALM_L2	ALM_L3	ALM_L4	ALM_1DA	PLM_L1	PLM_L2	PLM_L3	PLM_L4	PLM_1DA			mean No of lesion	SEM
0	0	3	4	9	0	1	4	6	10		ALM_L1	0.0555556	0.0289694
0	1	3	5	9	0	2	4	4	7		ALM_L2	0.8	0.133333
0	2	2	6	10	0	1	3	1	6		ALM_L3	1.92222	0.159766
0	2	0	10	7	0	2	4	4	6		ALM_L4	5.27778	0.189636
0	2	1	3	8	0	0	4	1	2		ALM_1DA	8.63333	0.155185
0	0	0	7	7	0	0	1	0	5		PLM_L1	0.155556	0.0521955
0	0	1	5	7	0	0	4	0	8		PLM_L2	0.933333	0.142914
0	0	2	4	12	0	3	2	10	6		PLM_L3	2.5	0.189783
0	0	1	6	8	0	0	1	3	0		PLM_L4	3.44444	0.287532
0	3	1	7	8	0	2	1	0	8		PLM_1DA	6.02222	0.315626
1	0	2	8	9	0	0	0	1	6
0	0	2	6	8	0	0	5	2	8
0	3	2	5	11	0	2	4	2	6
0	0	2	3	8	0	0	0	4	4
0	4	3	4	6	0	4	0	7	6
0	3	4	4	9	2	4	3	1	2
0	0	2	5	6	0	0	3	1	0
0	0	0	12	9	0	0	3	0	13
0	0	1	5	9	0	2	1	8	7
0	0	1	4	7	0	0	2	1	7
0	0	2	3	8	0	5	0	1	0
0	0	3	3	8	0	0	3	5	10
0	1	1	2	11	0	2	4	7	5
0	0	4	4	8	0	1	3	5	7
0	0	2	7	11	2	0	0	2	12
0	0	1	5	6	0	1	0	1	7
0	0	1	3	9	0	0	5	4	4
0	1	2	5	9	0	0	4	2	7
0	0	4	4	9	0	0	2	0	7
0	2	0	5	10	0	1	0	3	6
0	0	3	6	8	0	0	5	3	7
0	0	2	5	9	0	2	6	2	8
0	3	1	5	8	0	4	1	4	0
0	0	0	4	4	0	0	3	2	8
0	0	0	5	9	0	1	1	3	4
0	0	0	7	9	0	0	1	1	8
0	0	0	4	10	0	2	0	4	8
0	1	1	6	9	0	6	3	4	9
0	0	3	5	8	0	1	2	9	8
0	1	0	8	8	0	0	3	6	4
0	3	1	3	9	0	2	1	2	4
0	0	2	4	8	0	0	2	0	5
0	2	1	2	11	0	2	3	2	4
0	0	0	5	8	0	0	3	0	2
1	0	3	0	8	2	0	1	4	13
0	0	0	5	8	2	0	1	0	6
0	0	1	6	6	0	0	3	0	4
0	0	0	6	12	0	0	0	4	7
0	0	0	6	9	0	2	4	8	5
0	0	0	3	10	1	0	1	0	8
0	0	2	7	10	0	3	4	2	4
0	2	2	6	10	0	1	2	6	9
0	0	2	3	10	1	0	3	4	5
0	0	1	6	8	0	0	6	5	8
0	1	1	7	8	0	1	3	5	8
0	0	4	7	6	0	0	1	9	0
0	1	4	6	7	0	1	4	7	4
0	0	4	7	8	0	0	0	11	4
0	0	1	5	8	0	0	1	5	9
0	0	3	6	11	0	0	2	4	8
0	3	3	5	9	1	3	2	4	5
0	2	5	8	9	0	0	3	4	5
0	4	0	8	10	0	0	0	4	6
0	0	3	7	8	0	0	5	2	8
0	0	5	6	9	0	0	3	2	3
0	0	6	4	11	0	0	2	0	7
0	0	5	4	9	0	0	3	9	7
0	0	3	6	8	1	0	4	4	5
0	4	2	6	9	0	4	5	4	9
0	0	4	5	12	0	0	2	0	9
0	0	4	6	7	0	0	5	3	8
0	1	0	4	8	0	1	0	4	0
1	2	0	3	8	0	0	0	2	5
0	1	0	7	8	0	2	7	1	0
0	0	0	7	11	0	2	6	4	6
0	0	2	3	6	0	0	4	5	3
0	4	4	6	10	2	1	0	3	0
0	1	0	6	9	0	0	6	4	10
0	3	2	6	9	0	0	1	6	5
0	0	3	9	7	0	0	3	4	9
0	0	3	4	9	0	0	3	1	4
0	0	4	5	8	0	0	1	0	6
0	0	3	4	9	0	0	5	7	8
0	1	2	4	10	0	3	0	1	13
0	1	2	4	7	0	3	4	6	4
0	5	1	6	10	0	0	2	5	6
0	2	2	5	9	0	2	4	2	7
0	0	2	5	8	0	0	2	10	4
0	0	5	6	8	0	2	0	7	6
2	0	3	7	9	0	0	3	0	11

## Sheet: Figure 1-figure supplement 1K
	wt ctrl_dop	wts-1 mutant_dop	wt ctrl_GABA	wts-1 mutant_GABA	wt ctrl_Ach	wts-1 mutant_Ach
intact	94.4444	98.8889	100	98.8889	98.8889	100
defective	5.55556	1.11111	0	1.11111	1.11111	0
