# Supplementary material for: Neuroprotective role of Hippo signaling by microtubule stability control in Caenorhabditis elegans
Source: eLife. 2025 Apr 3;13:RP102001. doi: 10.7554/eLife.102001 (PMC11968107; doi:10.7554/eLife.102001)
Supplement: Figure 1—source data 1. [file elife-102001-fig1-data1.xlsx]

## Sheet: Figure 1D
									mean of defective neuron(%)			SEM
	WT_1	WT_2	WT_3	wts-1_1	wts-1_2	wts-1_3			WT	wts-1		WT	wts-1
ALM L1	0	0	3.33333	3.33333	3.33333	6.66667		ALM L1	1.11111	4.44444		1.11111	1.11111
ALM L2	0	0	0	33.3333	26.6667	46.6667		ALM L2	0	35.5556		0	5.87945
ALM L3	3.33333	0	0	86.6667	70	80		ALM L3	1.11111	78.8889		1.11111	4.84322
ALM L4	3.33333	0	3.33333	100	96.6667	100		ALM L4	2.22222	98.8889		1.11111	1.11111
ALM 1DA	0	3.33333	3.33333	100	100	100		ALM 1DA	2.22222	100		1.11111	0
PLM L1	0	0	0	6.66667	13.3333	10		PLM L1	0	10		0	1.9245
PLM L2	0	0	6.66667	50	43.3333	33.3333		PLM L2	2.22222	42.2222		2.22222	4.84322
PLM L3	0	0	0	76.6667	90	80		PLM L3	0	82.2222		0	4.00617
PLM L4	0	0	3.33333	83.3333	93.3333	86.6667		PLM L4	1.11111	87.7778		1.11111	2.93972
PLM 1DA	0	0	3.33333	93.3333	93.3333	96.6667		PLM 1DA	1.11111	94.4444		1.11111	1.11111

## Sheet: Figure 1E
	Touch responses per 10 touches					mean
	WT_L4	wts-1_L4	WT_1DA	wts-1_1DA		WT_L4	wts-1_L4	WT_1DA	wts-1_1DA
	9	9	10	8		9.4	6.4	8.1	5.46667
	10	8	9	4
	8	8	8	8		SEM
	10	7	9	7		WT_L4	wts-1_L4	WT_1DA	wts-1_1DA
	10	8	9	4		0.148556	0.290065	0.210909	0.344858
	10	7	7	6
	9	7	7	6
	10	6	9	9
	10	6	10	6
	7	7	8	6
	10	6	8	4
	9	4	8	7
	9	5	7	5
	10	5	9	6
	9	5	8	2
	10	6	8	6
	9	9	8	5
	8	7	8	9
	9	6	5	3
	8	4	7	8
	9	3	8	5
	10	4	10	7
	10	8	8	5
	10	5	7	4
	10	6	8	4
	10	9	9	4
	10	6	7	6
	10	8	6	5
	10	6	9	3
	9	7	9	2
