# Supplementary material for: Neuroprotective role of Hippo signaling by microtubule stability control in Caenorhabditis elegans
Source: eLife. 2025 Apr 3;13:RP102001. doi: 10.7554/eLife.102001 (PMC11968107; doi:10.7554/eLife.102001)
Supplement: Figure 2—source data 1. [file elife-102001-fig2-data1.xlsx]

## Sheet: Figure 2D
touch response per 10 touches at L4					mean touch response per 10 touches at L4				SEM
muIs35	wts-1 muIs35	wts-1; yap-1 muIs35			muIs35	wts-1 muIs35	wts-1; yap-1 muIs35		muIs35	wts-1 muIs35	wts-1; yap-1 muIs35
10	6	8			9.32222	6.77778	8.46667		0.0905356	0.169289	0.120548
9	5	9
9	8	8
10	3	9
10	4	7
8	7	8
10	8	9
10	6	8
10	7	8
10	9	10
10	7	9
9	9	8
8	10	9
9	8	5
9	6	9
10	8	9
8	3	7
10	8	8
10	6	9
10	9	9
10	8	8
9	7	10
10	5	8
10	5	10
7	5	6
10	6	7
9	7	9
9	6	8
8	9	9
10	7	8
10	8	8
9	7	8
9	6	9
8	5	10
9	6	9
7	9	9
10	6	10
10	7	9
10	8	7
9	8	9
9	6	9
8	8	7
8	7	9
10	4	9
10	8	6
10	9	10
10	8	6
10	6	8
9	6	8
7	6	10
10	5	8
9	7	10
10	2	7
10	6	9
10	7	10
9	8	6
10	3	10
8	8	9
10	7	9
10	6	6
10	7	9
8	6	8
8	5	9
10	6	9
8	9	9
9	8	10
10	7	9
9	8	9
10	8	10
8	7	8
10	9	9
8	7	8
10	8	9
10	7	10
10	9	10
10	8	9
9	7	7
10	6	8
10	8	8
9	8	9
10	2	10
9	6	8
8	8	8
9	8	7
10	7	10
9	7	8
9	7	7
10	6	8
10	6	7
10	6	9

## Sheet: Figure 2E
touch response per 10 touches at 1DA					mean touch response per 10 touches at 1DA				SEM
muIs35	wts-1 muIs35	wts-1; yap-1 muIs35			muIs35	wts-1 muIs35	wts-1; yap-1 muIs35		muIs35	wts-1 muIs35	wts-1; yap-1 muIs35
5	5	9			8.64444	6.53333	8.03333		0.123728	0.182369	0.146068
10	7	9
8	7	7
10	7	5
8	9	9
8	9	10
8	6	9
10	7	8
9	9	10
10	6	10
10	7	7
8	7	10
9	6	9
10	6	8
9	7	7
10	6	8
9	6	10
10	4	5
9	10	7
8	8	8
8	8	10
9	7	7
10	5	10
9	5	9
8	8	9
9	5	7
8	7	9
10	10	8
9	8	7
8	7	7
9	8	8
10	6	8
7	2	7
10	5	9
10	7	10
6	4	7
10	8	8
8	6	9
8	8	8
10	6	10
9	3	8
8	6	9
9	8	7
9	6	8
10	6	5
9	6	10
9	7	8
8	8	9
7	2	10
10	6	6
10	6	6
8	5	5
6	10	8
9	3	9
10	7	9
10	6	6
8	7	6
7	10	9
10	6	7
9	8	6
7	6	9
9	8	7
8	4	9
8	6	10
8	5	8
9	9	6
8	5	9
6	6	6
8	3	8
8	4	8
7	9	8
10	7	10
6	5	7
10	7	9
9	6	8
8	8	8
9	9	8
9	8	8
10	7	9
8	6	7
8	6	10
7	5	6
7	7	10
9	6	7
10	6	8
10	8	6
8	4	8
8	9	7
9	7	9
8	7	7

## Sheet: Figure 2F
Genotype	Median Lifespan (days)	# animals Died/ Total		chi	P Value	corrected P Value
muIs35	17	61/100	v.s. wts-1(ok753); muIs35	17.13	3.5e-05	0.0001
			v.s. wts-1(ok753); yap-1(tm1416); muIs35	36.06	0	0
wts-1(ok753); muIs35	12	80/100	v.s. muIs35	17.13	3.5e-05	0.0001
			v.s. wts-1(ok753); yap-1(tm1416); muIs35	11.57	0.0007	0.0013
wts-1(ok753); yap-1(tm1416); muIs35	10	82/100	v.s. muIs35	36.06	0	0
			v.s. wts-1(ok753); muIs35	11.57	0.0007	0.0013
muIs35	22	49/100	v.s. wts-1(ok753); muIs35	56.09	0	0
			v.s. wts-1(ok753); yap-1(tm1416); muIs35	61.58	0	0
wts-1(ok753); muIs35	12	76/100	v.s. muIs35	56.09	0	0
			v.s. wts-1(ok753); yap-1(tm1416); muIs35	3.09	0.0787	0.1573
wts-1(ok753); yap-1(tm1416); muIs35	11	45/100	v.s. muIs35	61.58	0	0
			v.s. wts-1(ok753); muIs35	3.09	0.0787	0.1573
muIs35	18	60/100	v.s. wts-1(ok753); muIs35	38.45	0	0
			v.s. wts-1(ok753); yap-1(tm1416); muIs35	50.87	0	0
wts-1(ok753); muIs35	12	83/100	v.s. muIs35	38.45	0	0
			v.s. wts-1(ok753); yap-1(tm1416); muIs35	7.88	0.005	0.01
wts-1(ok753); yap-1(tm1416); muIs35	11	57/100	v.s. muIs35	50.87	0	0
			v.s. wts-1(ok753); muIs35	7.88	0.005	0.01
