# Supplementary material for: Neuroprotective role of Hippo signaling by microtubule stability control in Caenorhabditis elegans
Source: eLife. 2025 Apr 3;13:RP102001. doi: 10.7554/eLife.102001 (PMC11968107; doi:10.7554/eLife.102001)
Supplement: Figure 3—figure supplement 1—source data 1. [file elife-102001-fig3-figsupp1-data1.xlsx]

## Sheet: Figure 3-figure supplement 1B
defective neurons at 1DA(%)
Ctrl_ALM	SAS1-1_ALM	SAS1-2_ALM	SAS1-3_ALM	Ctrl_PLM	SAS1-1_PLM	SAS1-2_PLM	SAS1-3_PLM
0	33.3333	40	46.6667	3.33333	33.3333	53.3333	50
0	53.3333	53.3333	50	3.33333	50	43.3333	60
3.33333	56.6667	50	40	0	53.3333	56.6667	53.3333
mean of defective neurons at 1DA (%)
Ctrl_ALM	SAS1-1_ALM	SAS1-2_ALM	SAS1-3_ALM	Ctrl_PLM	SAS1-1_PLM	SAS1-2_PLM	SAS1-3_PLM
1.11111	47.7778	47.7778	45.5556	2.22222	45.5556	51.1111	54.4444
SEM
Ctrl_ALM	SAS1-1_ALM	SAS1-2_ALM	SAS1-3_ALM	Ctrl_PLM	SAS1-1_PLM	SAS1-2_PLM	SAS1-3_PLM
1.11111	7.28604	4.00617	2.93972	1.11111	6.18641	4.00617	2.93972

## Sheet: Figure 3-figure supplement 1C
defective neurons at 1DA (%)
Ctrl_ALM	SAS2-1_ALM	SAS2-2_ALM	SAS2-3_ALM	Ctrl_PLM	SAS2-1_PLM	SAS2-2_PLM	SAS2-3_PLM
0	40	33.3333	50	3.33333	46.6667	36.6667	53.3333
0	56.6667	50	60	3.33333	50	43.3333	50
3.33333	43.3333	50	43.3333	0	53.3333	56.6667	56.6667
mean of defective neurons at 1DA (%)
Ctrl_ALM	SAS2-1_ALM	SAS2-2_ALM	SAS2-3_ALM	Ctrl_PLM	SAS2-1_PLM	SAS2-2_PLM	SAS2-3_PLM
1.11111	46.6667	44.4444	51.1111	2.22222	50	45.5556	53.3333
SEM
1.11111	5.09175	5.55556	4.84322	1.11111	1.9245	5.87945	1.9245
