# Supplementary material for: Neuroprotective role of Hippo signaling by microtubule stability control in Caenorhabditis elegans
Source: eLife. 2025 Apr 3;13:RP102001. doi: 10.7554/eLife.102001 (PMC11968107; doi:10.7554/eLife.102001)
Supplement: Figure 3—source data 1. [file elife-102001-fig3-data1.xlsx]

## Sheet: FIgure 3C
defective neurons at L4 (%)
Ctrl_ALM	SAS1-1_ALM	SAS1-2_ALM	SAS1-3_ALM	Ctrl_PLM	SAS1-1_PLM	SAS1-2_PLM	SAS1-3_PLM
0	53.3333	36.6667	40	3.33333	50	40	53.3333
0	36.6667	56.6667	46.6667	0	30	50	53.3333
0	33.3333	40	33.3333	0	50	56.6667	56.6667
mean of defective neurons at L4 (%)
Ctrl_ALM	SAS1-1_ALM	SAS1-2_ALM	SAS1-3_ALM	Ctrl_PLM	SAS1-1_PLM	SAS1-2_PLM	SAS1-3_PLM
0	41.1111	44.4445	40	1.11111	43.3333	48.8889	54.4444
SEM
Ctrl_ALM	SAS1-1_ALM	SAS1-2_ALM	SAS1-3_ALM	Ctrl_PLM	SAS1-1_PLM	SAS1-2_PLM	SAS1-3_PLM
0	6.1864	6.18641	3.84902	1.11111	6.66667	4.84323	1.11113

## Sheet: Figure 3D
defective neurons at L4 (%)
Ctrl_ALM	SAS2-1_ALM	SAS2-2_ALM	SAS2-3_ALM	Ctrl_PLM	SAS2-1_PLM	SAS2-2_PLM	SAS2-3_PLM
0	40	36.6667	16.6667	0	46.6667	46.6667	46.6667
0	40	36.6667	50	0	46.6667	60	60
0	23.3333	40	40	0	56.6667	40	63.3333
mean of defective neurons at L4 (%)
Ctrl_ALM	SAS2-1_ALM	SAS2-2_ALM	SAS2-3_ALM	Ctrl_PLM	SAS2-1_PLM	SAS2-2_PLM	SAS2-3_PLM
0	34.4444	37.7778	35.5556	0	50	48.8889	56.6667
SEM
Ctrl_ALM	SAS2-1_ALM	SAS2-2_ALM	SAS2-3_ALM	Ctrl_PLM	SAS2-1_PLM	SAS2-2_PLM	SAS2-3_PLM
0	5.55557	1.1111	9.87576	0	3.33333	5.87945	5.09173

## Sheet: Figure 3F
defective neurons at L4 (%)
TG(-)_ALM	TG(+)_ALM	TG(-)_PLM	TG(+)_PLM
0	40	0	45
0	50	5	25
0	25	5	30
mean of defective neurons at L4 (%)
TG(-)_ALM	TG(+)_ALM	TG(-)_PLM	TG(+)_PLM
0	38.3333	3.33333	33.3333
SEM
TG(-)_ALM	TG(+)_ALM	TG(-)_PLM	TG(+)_PLM
0	7.26483	1.66667	6.00925

## Sheet: Figure 3I
defective ALM (%)
Ctrl	1ng_1	1ng_2	1ng_3	10ng_1	10ng_2	10ng_3	50ng_1	50ng_2	50ng_3	100ng_1	100ng_2	100ng_3
0	0	6.66667	6.66667	10	13.3333	10	50	23	36.6667	66.6667	56.6667	53.3333
0	6.66667	0	6.66667	6.66667	6.66667	10	23.3333	33.3333	46.6667	40	50	33.3333
0	0	0	0	10	13.3333	13.3333	33.3333	33.3333	26.6667	40	36.6667	33.3333
mean of defective ALM (%)
Ctrl	1ng_1	1ng_2	1ng_3	10ng_1	10ng_2	10ng_3	50ng_1	50ng_2	50ng_3	100ng_1	100ng_2	100ng_3
0	2.22222	2.22222	4.44445	8.88889	11.1111	11.1111	35.5555	29.8889	36.6667	48.8889	47.7778	40
SEM
Ctrl	1ng_1	1ng_2	1ng_3	10ng_1	10ng_2	10ng_3	50ng_1	50ng_2	50ng_3	100ng_1	100ng_2	100ng_3
0	2.22222	2.22222	2.22222	1.11111	2.22221	1.1111	7.77779	3.44443	5.7735	8.8889	5.87945	6.66667

## Sheet: FIgure 3J
defective PLM at L4 (%)
Ctrl	1ng_1	1ng_2	1ng_3	10ng_1	10ng_2	10ng_3	50ng_1	50ng_2	50ng_3	100ng_1	100ng_2	100ng_3
0	0	3.33333	6.66667	10	13.3333	10	56.6667	50	40	66.6667	53.3333	66.6667
0	0	0	0	13.3333	10	13.3333	43.3333	43.3333	46.6667	33.3333	43.3333	40
3.33333	3.33333	3.33333	6.66667	23.3333	16.6667	16.6667	46.6667	43.3333	40	33.3333	50	40
mean of defective PLM (%)
Ctrl	1ng_1	1ng_2	1ng_3	10ng_1	10ng_2	10ng_3	50ng_1	50ng_2	50ng_3	100ng_1	100ng_2	100ng_3
1.11111	1.11111	2.22222	4.44445	15.5555	13.3333	13.3333	48.8889	45.5555	42.2222	44.4444	48.8889	48.8889
SEM
Ctrl	1ng_1	1ng_2	1ng_3	10ng_1	10ng_2	10ng_3	50ng_1	50ng_2	50ng_3	100ng_1	100ng_2	100ng_3
1.11111	1.11111	1.11111	2.22222	4.00616	1.92451	1.92451	4.00618	2.22223	2.22223	11.1111	2.93973	8.8889
