# Supplementary material for: Neuroprotective role of Hippo signaling by microtubule stability control in Caenorhabditis elegans
Source: eLife. 2025 Apr 3;13:RP102001. doi: 10.7554/eLife.102001 (PMC11968107; doi:10.7554/eLife.102001)
Supplement: Figure 4—figure supplement 1—source data 1. [file elife-102001-fig4-figsupp1-data1.xlsx]

## Sheet: Figure 4-figure supplement 1B
# of swelling per neuron at L4						mean # of swelling per neuron					SEM
Ctrl_ALM	paclitaxel_ALM	Ctrl_PLM	paclitaxel_PLM			Ctrl_ALM	paclitaxel_ALM	Ctrl_PLM	paclitaxel_PLM		Ctrl_ALM	paclitaxel_ALM	Ctrl_PLM	paclitaxel_PLM
9	6	3	7			6.3	6.11667	2.98333	2.8		0.210327	0.226857	0.267328	0.250198
6	7	5	4
7	5	5	1
9	8	2	2
6	4	3	2
5	7	2	2
5	1	9	3
7	9	6	0
10	6	5	0
7	10	5	3
8	4	4	4
4	8	10	2
6	6	4	5
5	7	3	3
8	7	0	6
3	7	3	2
8	6	2	4
7	5	4	7
8	4	4	2
4	4	0	2
7	4	3	2
6	6	4	3
8	5	3	1
4	4	2	2
7	6	5	2
7	6	1	4
5	7	1	7
4	5	5	4
8	8	0	1
7	10	4	4
5	10	4	5
5	8	7	0
5	6	3	1
8	8	2	7
5	6	0	4
6	3	0	4
4	8	2	2
8	8	4	2
6	6	4	2
6	7	3	6
8	4	3	1
7	5	2	3
5	5	1	1
7	7	3	1
6	5	4	1
5	8	0	5
11	6	1	1
8	5	4	1
4	7	2	1
7	5	2	4
6	5	1	1
5	5	0	0
7	7	1	6
4	8	1	2
5	4	2	5
7	6	1	1
5	7	3	1
6	5	4	3
6	6	4	4
6	5	4	2

## Sheet: Figure 4-figure supplement 1C
intact neurons at L4 (%)					mean of intact neurons at L4 (%)					SEM
Ctrl_ALM	paclitaxel_ALM	Ctrl_PLM	paclitaxel_PLM		Ctrl_ALM	paclitaxel_ALM	Ctrl_PLM	paclitaxel_PLM		Ctrl_ALM	paclitaxel_ALM	Ctrl_PLM	paclitaxel_PLM
0	0	10	10		0	0	8.33333	11.6667		0	0	1.66667	4.40959
0	0	10	20
0	0	5	5
