# Supplementary material for: Neuroprotective role of Hippo signaling by microtubule stability control in Caenorhabditis elegans
Source: eLife. 2025 Apr 3;13:RP102001. doi: 10.7554/eLife.102001 (PMC11968107; doi:10.7554/eLife.102001)
Supplement: Figure 4—source data 1. [file elife-102001-fig4-data1.xlsx]

## Sheet: Figure 4C
# of swelling per neuron					mean # of swelling per neuron					SEM
Ctrl ALM	unc-54i ALM	Ctrl PLM	unc-54i PLM		Ctrl ALM	unc-54i ALM	Ctrl PLM	unc-54i PLM		Ctrl ALM	unc-54i ALM	Ctrl PLM	unc-54i PLM
8	5	8	9		7.67368	4.85106	6.58947	2.95745		0.25636	0.250352	0.297618	0.273899
10	5	14	0
12	1	10	9
8	6	6	2
10	1	7	2
10	7	8	2
12	4	10	0
13	0	5	2
9	6	3	2
10	7	6	5
5	6	7	4
12	3	7	7
4	0	13	1
6	8	7	1
11	7	4	3
8	5	4	1
8	6	5	0
7	4	2	1
7	1	6	1
8	8	7	5
9	3	5	1
7	7	5	2
9	9	9	9
7	4	8	7
7	4	7	0
7	5	2	0
5	3	5	8
13	4	4	3
5	4	4	0
12	2	4	2
5	5	4	4
5	3	7	0
5	5	7	3
4	3	4	0
5	6	4	10
4	5	4	2
5	5	6	4
4	9	5	10
4	4	6	2
6	6	9	3
6	6	7	3
6	5	2	4
7	3	2	3
7	8	7	0
4	8	2	2
8	0	7	4
15	4	15	0
8	2	16	4
9	1	9	0
5	4	7	3
6	7	6	5
6	8	4	1
9	1	6	1
8	5	3	5
7	8	5	2
7	3	9	1
7	9	7	4
2	0	7	0
7	5	10	0
10	5	7	2
8	5	9	0
12	2	4	6
7	4	7	0
10	5	6	3
7	5	5	5
10	2	3	1
6	3	3	3
10	10	6	0
2	5	4	3
5	2	2	3
6	4	11	10
10	0	3	6
9	7	6	5
8	6	7	2
10	10	6	3
9	7	10	3
6	7	6	0
7	4	4	0
11	6	14	2
11	4	9	5
9	11	12	2
8	6	7	4
8	6	11	2
5	6	6	5
10	6	7	2
9	2	8	4
5	8	7	0
8	5	8	7
5	4	7	5
9	5	8	7
8	4	9	6
8	6	7	1
7	6	8	1
8	5	5	1
8		5

## Sheet: Figure 4D
intact neurons at L4 (%)					mean of intact neurons at L4 (%)					SEM
Ctrl ALM	unc-54i ALM	Ctrl PLM	unc-54i PLM		Ctrl ALM	unc-54i ALM	Ctrl PLM	unc-54i PLM		Ctrl ALM	unc-54i ALM	Ctrl PLM	unc-54i PLM
0	9.09091	0	13.6364		0	5.0505	0	19.8214		0	2.94492	0	3.57109
0	0	0	26.087
0	11.1111	0	25.9259
0	0	0	13.6364

## Sheet: Figure 4E
# of swmming per 30 sec							mean # of swmming per 30 sec							SEM
Ctrl	unc-89i	deb-1i	unc-15i	unc-54i	unc-95i		Ctrl	unc-89i	deb-1i	unc-15i	unc-54i	unc-95i		Ctrl	unc-89i	deb-1i	unc-15i	unc-54i	unc-95i
70	54	81	32	21	62		75.08	69.9	74.14	41.1	41.72	48.9		2.63336	2.87313	3.45915	2.41107	2.64992	3.32452
45	34	58	45	27	65
65	77	15	53	33	62
79	69	86	16	43	64
64	55	93	36	56	65
65	80	69	51	39	65
60	87	70	46	33	3
72	58	83	53	13	61
67	55	76	75	11	70
68	71	63	37	58	10
57	1	74	58	26	80
40	78	77	54	43	24
60	87	97	49	44	38
80	75	70	49	22	29
54	62	88	39	10	27
63	80	79	25	62	15
81	67	92	34	30	20
87	35	34	51	41	12
90	50	85	75	41	81
71	56	71	12	60	43
58	76	86	79	44	45
52	75	87	54	53	74
68	83	83	43	58	46
92	84	36	38	42	48
80	83	83	11	29	19
82	45	89	48	57	15
28	46	56	18	54	74
86	71	89	17	70	49
64	87	31	75	41	66
50	46	41	15	33	20
94	91	86	43	52	92
77	58	77	18	72	48
95	94	87	51	85	63
87	66	35	56	43	68
91	63	95	52	16	47
74	78	87	29	37	13
86	49	8	19	60	57
94	64	93	20	8	76
92	90	100	46	67	44
93	81	78	40	54	83
93	85	73	19	9	33
101	81	99	53	36	15
97	80	93	38	26	33
104	94	96	57	77	85
86	110	99	29	60	61
29	95	68	38	52	41
86	32	99	46	13	41
97	78	4	31	38	48
76	94	94	50	50	69
104	85	94	32	37	76

## Sheet: Figure 4F
# of swelling per neuron											mean # of swelling per neuron
Ctrl_ALM	unc-89i_ALM	deb-1i_ALM	unc-15i_ALM	unc-95i_ALM	Ctrl_PLM	unc-89i_PLM	deb-1i_ PLM	unc-15i_PLM	unc-95i_PLM		Ctrl_ALM	unc-89i_ALM	deb-1i_ALM	unc-15i_ALM	unc-95i_ALM	Ctrl_PLM	unc-89i_PLM	deb-1i_ PLM	unc-15i_PLM	unc-95i_PLM
3	5	6	3	4	6	6	3	5	7		5.73438	5.19048	4.46032	3.97531	3.25373	4.875	4.46032	4.09524	3.49383	3.25373
5	7	6	4	2	4	8	0	0	5
7	5	1	6	0	7	4	3	3	2		SEM
4	4	3	5	8	2	5	1	5	7		Ctrl_ALM	unc-89i_ALM	deb-1i_ALM	unc-15i_ALM	unc-95i_ALM	Ctrl_PLM	unc-89i_PLM	deb-1i_ PLM	unc-15i_PLM	unc-95i_PLM
4	7	1	4	4	5	2	2	2	3		0.261864	0.264717	0.251799	0.241507	0.213034	0.275036	0.304284	0.289529	0.231823	0.256391
4	4	3	6	3	3	4	2	6	5
3	5	2	3	2	6	2	4	4	3
5	6	8	4	4	4	2	8	3	1
7	2	7	3	4	5	6	7	1	5
4	1	3	3	2	5	7	4	0	4
6	3	6	5	3	5	4	0	1	5
5	8	3	6	5	3	5	9	0	2
7	5	3	3	3	6	5	5	4	3
4	6	3	4	1	1	5	1	5	1
4	5	8	6	4	4	5	4	5	4
5	5	1	3	3	9	4	6	6	5
5	4	5	5	4	4	5	3	2	5
4	4	3	4	5	2	5	4	2	2
9	13	5	2	8	3	11	3	3	1
6	1	2	4	0	5	2	0	2	1
2	4	4	5	4	3	1	1	6	3
4	3	6	8	2	5	2	1	1	1
5	7	4	0	3	4	0	3	8	4
10	2	5	8	3	5	1	1	6	0
6	3	4	6	3	3	5	2	3	6
6	7	2	6	6	3	3	4	4	2
5	7	2	3	3	10	2	4	3	6
6	7	4	1	2	2	5	5	6	4
6	3	2	4	3	3	6	5	2	2
6	3	3	3	2	3	9	2	1	1
5	6	5	6	0	3	4	7	3	1
4	4	5	4	4	5	5	6	1	6
4	5	5	3	3	4	4	2	4	2
6	6	7	10	2	3	3	2	3	2
7	6	3	5	4	5	3	2	4	2
6	6	6	6	3	6	4	4	5	4
5	5	5	4	1	4	3	5	3	4
9	2	3	6	1	2	3	1	4	7
8	6	5	3	3	2	2	4	2	1
6	6	3	7	5	2	8	2	2	1
8	2	7	5	1	4	2	7	6	0
7	5	7	7	6	2	1	2	9	1
2	5	7	7	3	4	2	5	3	5
7	6	9	4	3	7	7	6	6	1
7	4	5	2	7	2	7	4	7	2
11	5	6	7	4	6	8	4	3	4
11	6	2	4	6	5	10	6	2	8
6	4	3	8	2	8	1	5	5	3
6	5	6	1	2	10	4	5	3	1
6	5	4	6	6	6	1	6	5	4
10	5	5	5	2	7	8	3	1	2
7	6	2	4	4	5	6	3	4	2
7	7	2	5	3	7	4	5	3	2
6	6	6	2	0	9	3	7	1	2
1	8	7	0	3	4	3	7	4	5
4	8	6	2	5	6	3	8	7	5
5	10	6	4	3	5	6	7	5	7
6	9	4	4	3	7	7	5	6	7
6	4	4	4	4	7	7	6	6	3
3	4	2	0	5	5	8	6	5	2
2	7	7	1	2	6	4	3	0	4
9	4	8	1	4	5	3	9	8	1
6	4	4	1	3	8	6	7	2	1
7			2	1	11			4	1
			0	4				4	7
			4	4				4	2
			3	2				6	6
			4					1
			7					1
			6					3
			2					2
			0					2
			6					4
			1					5
			4					5
			3					0
			6					0
			3					2
			4					4
			1					2
			1					3

## Sheet: FIgure 4H
# of swelling per neuron at L4					mean # of swelling per neuron					SEM
Ctrl_ALM	Colchicine_ALM	Ctrl_PLM	Colchicine_PLM		Ctrl_ALM	Colchicine_ALM	Ctrl_PLM	Colchicine_PLM		Ctrl_ALM	Colchicine_ALM	Ctrl_PLM	Colchicine_PLM
6	0	8	0		5.87912	2.94565	4.40659	0.891304		0.213028	0.216103	0.31253	0.157305
10	1	0	0
7	8	10	2
5	1	4	0
9	0	4	0
7	2	9	0
7	0	5	0
7	3	4	0
3	1	10	0
0	3	7	0
7	4	3	0
7	2	4	0
6	6	0	1
2	2	5	0
6	4	5	0
8	6	9	1
9	3	4	0
6	6	8	2
9	5	9	4
5	4	8	1
7	9	1	0
5	4	5	3
4	9	5	5
6	3	4	3
7	4	7	3
5	2	2	2
8	3	2	0
6	0	0	2
7	1	5	2
4	4	7	1
5	3	0	1
7	3	0	0
4	4	3	2
2	2	0	0
7	3	0	0
12	4	4	2
7	2	0	0
6	2	0	8
8	0	3	0
7	2	0	1
8	5	8	0
7	5	4	0
5	3	4	1
5	3	2	1
7	4	9	1
6	3	8	0
10	1	2	0
4	0	6	0
6	2	4	2
9	0	2	0
8	1	3	0
6	3	7	0
6	2	3	0
5	4	8	0
2	7	4	0
7	5	2	0
5	1	7	0
7	0	1	2
6	4	3	2
7	6	4	0
5	0	2	0
4	4	6	0
4	3	5	0
4	3	1	3
10	2	7	0
4	1	6	0
6	5	2	0
6	2	1	0
7	5	1	0
6	4	4	0
5	4	4	3
3	1	2	0
1	0	8	0
6	7	9	1
8	7	2	0
7	3	1	0
4	2	7	1
7	3	8	0
4	3	8	3
7	2	6	1
5	2	2	1
4	4	12	0
4	1	0	2
6	2	1	0
4	1	6	0
4	2	7	0
3	1	6	0
6	0	5	5
5	4	4	0
5	2	5	0
5	4	8	1
	3		6

## Sheet: Figure 4I
intact neurons at L4 (%)					mean of intact neurons at L4 (%)					SEM
Ctrl_ALM	Colchicine_ALM	Ctrl_PLM	Colchicine_PLM		Ctrl_ALM	Colchicine_ALM	Ctrl_PLM	colchicine_PLM		Ctrl_ALM	Colchicine_ALM	Ctrl_PLM	colchicine_PLM
4.7619	12.5	9.52381	62.5		1.19048	11.7097	12.0301	59.3552		1.19048	1.22364	7.36333	7.79316
0	10	33.3333	40
0	14.8148	0	77.7778
0	9.52381	5.26316	57.1429

## Sheet: Figure 4J
# of swelling per neuron at 1DA					mean # of swelling per neuron at 1DA					SEM
Ctrl_ALM	Colchicine_ALM	Ctrl_PLM	Colchicine_PLM		Ctrl_ALM	Colchicine_ALM	Ctrl_PLM	Colchicine_PLM		Ctrl_ALM	Colchicine_ALM	Ctrl_PLM	Colchicine_PLM
8	0	22	8		8.56566	4.82222	6.57576	1.55556		0.243303	0.24407	0.390067	0.191656
10	9	5	2
11	5	14	2
9	9	17	1
8	9	2	0
14	7	7	4
9	9	5	0
12	9	9	0
8	10	12	0
8	4	10	0
8	5	6	0
12	6	11	5
8	4	15	0
9	7	6	4
8	6	10	3
8	5	13	4
8	8	9	2
5	5	12	3
10	3	10	0
8	10	12	0
10	7	5	3
11	3	3	3
12	4	7	2
5	8	1	8
12	4	11	3
14	6	5	2
6	2	8	2
15	3	6	2
6	4	4	0
12	6	7	1
10	4	4	0
7	5	4	7
10	4	5	0
9	5	5	3
10	2	2	0
9	6	6	0
6	5	2	0
10	5	4	1
6	2	1	0
9	7	3	0
7	6	2	2
7	7	6	2
11	5	0	2
10	2	5	1
4	9	4	1
7	5	5	2
9	3	12	2
7	9	6	0
9	4	11	1
12	4	19	0
5	4	5	2
10	3	6	4
7	5	10	0
8	4	5	1
6	4	4	1
4	3	7	1
10	7	7	1
7	2	9	1
8	5	10	0
8	4	7	2
8	2	4	4
13	4	8	4
9	3	8	1
9	2	6	3
12	2	6	0
6	2	6	5
6	1	3	0
11	5	11	0
6	2	4	2
5	6	7	0
10	3	8	0
5	3	3	1
7	3	8	1
10	7	6	0
10	6	6	1
8	6	4	0
9	5	2	1
5	7	3	4
8	3	4	0
11	3	5	1
7	3	3	2
8	3	0	0
7	3	5	0
6	4	7	0
6	7	6	4
7	10	12	0
4	3	5	0
12	5	7	3
4	3	6	0
7	1	3	2
8		6
7		5
9		6
8		4
8		6
10		2
12		8
12		5
12		3

## Sheet: Figure 4K
intact neurons at L4 (%)					mean of intact neurons at L4 (%)					SEM
Ctrl_ALM	Colchicine_ALM	Ctrl_PLM	Colchicine_PLM		Ctrl_ALM	Colchicine_ALM	Ctrl_PLM	Colchicine_PLM		Ctrl_ALM	Colchicine_ALM	Ctrl_PLM	Colchicine_PLM
0	5	0	45		0	1.25	1.71911	38.5		0	1.25	1.00641	6.11692
0	0	3.84615	32
0	0	0	25
0	0	3.0303	52

## Sheet: FIgure 4L
touch responses of wts-1 at L4 stage			mean touch responses of wts-1 at L4 stage			SEM
Ctrl	Colchicine treated		Ctrl	Colchicine treated		Ctrl	Colchicine treated
6	9		6.80488	7.80899		0.170409	0.150651
5	9
4	8
7	10
8	7
6	8
7	7
8	10
8	10
9	9
9	7
10	6
6	9
6	9
7	7
7	9
7	7
8	7
5	8
8	8
10	8
10	8
9	5
7	8
8	6
7	8
7	10
5	8
6	7
5	9
4	9
7	6
6	8
8	8
9	9
7	9
6	6
6	7
7	8
6	6
8	9
7	8
6	6
10	10
6	7
7	8
7	8
6	8
5	8
6	9
6	7
7	9
4	9
7	5
8	8
6	6
7	9
7	10
5	8
8	7
5	6
5	7
7	8
8	9
6	8
7	7
7	10
5	9
7	4
2	8
7	8
6	6
8	8
9	9
8	8
9	7
6	8
4	9
7	8
7	8
9	8
5	7
	6
	8
	7
	9
	6
	2
	8
	10
