# Supplementary material for: Neuroprotective role of Hippo signaling by microtubule stability control in Caenorhabditis elegans
Source: eLife. 2025 Apr 3;13:RP102001. doi: 10.7554/eLife.102001 (PMC11968107; doi:10.7554/eLife.102001)
Supplement: Figure 5—figure supplement 1—source data 1. [file elife-102001-fig5-figsupp1-data1.xlsx]

## Sheet: Figure 5-figure supplement 1B
somatic outgrowth of ALM (%)								mean percentage				SEM
	Ctrl_ALM	Ctrl_ALM	Ctrl_ALM	Colchicine_ALM	Colchicine_ALM	Colchicine_ALM			Ctrl_ALM	Colchicine_ALM			Ctrl_ALM	Colchicine_ALM
2day	0	4.7619	8.69565	0	4.7619	9.52381		2day	4.48585	4.7619		2day	2.51401	2.74929
4day	15	13.6364	9.52381	4.34783	9.52381	8.69565		4day	12.7201	7.52243		4day	1.64589	1.6052
6day	35	20	19.0476	8.33333	12.5	6.66667		6day	24.6825	9.16667		6day	5.16605	1.73472
8day	19.0476	30	27.2727	4.54545	10	9.09091		8day	25.4401	7.87879		8day	3.29178	1.6872
10day	25	34.7826	17.3913	9.09091	9.09091	4.7619		10day	25.7246	7.64791		10day	5.0335	1.443
15day	30	41.6667	13.0435	15	21.7391	4.34783		15day	28.2367	13.6957		15day	8.30971	5.06262
20day	16.6667	25	20.8333	8.33333	20	4.16667		20day	20.8333	10.8333		20day	2.40563	4.73853

## Sheet: Figure 5-figure supplement 1C
bipolar ALM (%)								mean percentage				SEM
	Ctrl_ALM	Ctrl_ALM	Ctrl_ALM	Colchicine_ALM	Colchicine_ALM	Colchicine_ALM			Ctrl_ALM	Colchicine_ALM			Ctrl_ALM	Colchicine_ALM
2day	0	0	0	0	0	0		2day	0	0		2day	0	0
4day	0	4.54545	4.7619	0	9.52381	8.69565		4day	3.10245	6.07315		4day	1.55248	3.04597
6day	10	10	30.9524	8.33333	8.33333	17.7778		6day	16.9841	11.4815		6day	6.98413	3.14815
8day	33.3333	25	36.3636	4.54545	0	9.09091		8day	31.5657	4.54545		8day	3.39738	2.62432
10day	29.1667	21.7391	39.1304	4.54545	9.09091	9.52381		10day	30.0121	7.72006		10day	5.0382	1.59221
15day	20	20.8333	43.4783	0	0	4.34783		15day	28.1039	1.44928		15day	7.69096	1.44928
20day	41.6667	40	54.1667	8.33333	0	12.5		20day	45.2778	6.94444		20day	4.47041	3.67465

## Sheet: Figure 5-figure supplement 1D
ectopic swelling of PLM (%)								mean percentage				SEM
	Ctrl_PLM	Ctrl_PLM	Ctrl_PLM	Colchicine_PLM	Colchicine_PLM	Colchicine_PLM			Ctrl_PLM	Colchicine_PLM			Ctrl_PLM	Colchicine_PLM
2day	0	0	8.69565	0	0	0		2day	2.89855	0		2day	2.89855	0
4day	25	45.4545	47.6191	0	9.52381	0		4day	39.3579	3.1746		4day	7.20607	3.1746
6day	75	45	57.1429	0	8.33333	6.66667		6day	59.0476	5		6day	8.71246	2.54588
8day	47.6191	60	59.0909	0	10	0		8day	55.57	3.33333		8day	3.98412	3.33333
10day	66.6667	39.1304	86.9565	4.54545	4.54545	14.2857		10day	64.2512	7.79221		10day	13.8589	3.24675
15day	60	45.8333	39.1304	0	0	0		15day	48.3213	0		15day	6.15161	0
20day	41.6667	35	41.6667	0	0	0		20day	39.4444	0		20day	2.22222	0

## Sheet: Figure 5-figure supplement 1E
ectopic branching of PLM (%)								mean percentage				SEM
	Ctrl_PLM	Ctrl_PLM	Ctrl_PLM	Colchicine_PLM	Colchicine_PLM	Colchicine_PLM			Ctrl_PLM	Colchicine_PLM			Ctrl_PLM	Colchicine_PLM
2day	4.7619	0	4.34783	0	0	0		2day	3.03658	0		2day	1.52299	0
4day	15	27.2727	33.3333	0	9.52381	0		4day	25.202	3.1746		4day	5.3927	3.1746
6day	30	35	28.5714	4.16667	4.16667	20		6day	31.1905	9.44444		6day	1.94889	5.27778
8day	33.3333	50	27.2727	4.54545	10	4.54545		8day	36.8687	6.36364		8day	6.79476	1.81818
10day	33.3333	17.3913	26.087	9.09091	0	9.52381		10day	25.6039	6.20491		10day	4.6084	3.10497
15day	25	37.5	47.8261	5	13.0435	4.34783		15day	36.7754	7.46377		15day	6.59928	2.7962
20day	16.6667	25	41.6667	0	5	4.16667		20day	27.7778	3.05556		20day	7.34931	1.5466

## Sheet: Figure 5-figure supplement 1F
beaded ALM (%)
	Ctrl_ALM	Ctrl_ALM	Ctrl_ALM	Colchicine_ALM	Colchicine_ALM	Colchicine_ALM			Ctrl_ALM	Colchicine_ALM			Ctrl_ALM	Colchicine_ALM
2day	0	0	0	0	0	0		2day	0	0		2day	0	0
4day	5	0	0	4.34783	4.7619	0		4day	1.66667	3.03658		4day	1.66667	1.52299
6day	5	0	2.38095	0	0	0		6day	2.46032	0		6day	1.44392	0
8day	0	15	4.54545	4.54545	0	0		8day	6.51515	1.51515		8day	4.44071	1.51515
10day	0	8.69565	0	0	0	0		10day	2.89855	0		10day	2.89855	0
15day	30	0	8.69565	20	0	0		15day	12.8986	6.66667		15day	8.91157	6.66667
20day	8.33333	15	0	8.33333	10	4.16667		20day	7.77778	7.5		20day	4.33903	1.73472

## Sheet: Figure 5-figure supplement 1G
ectopic branching of ALM (%)
	Ctrl_ALM	Ctrl_ALM	Ctrl_ALM	Colchicine_ALM	Colchicine_ALM	Colchicine_ALM			Ctrl_ALM	Colchicine_ALM			Ctrl_ALM	Colchicine_ALM
2day	0	0	0	0	0	0		2day	0	0		2day	0	0
4day	5	0	0	0	0	0		4day	1.66667	0		4day	1.66667	0
6day	0	5	2.38095	0	0	0		6day	2.46032	0		6day	1.44392	0
8day	14.2857	5	0	4.54545	0	0		8day	6.42857	1.51515		8day	4.18533	1.51515
10day	0	4.34783	0	0	0	0		10day	1.44928	0		10day	1.44928	0
15day	10	0	4.34783	0	0	0		15day	4.78261	0		15day	2.89493	0
20day	16.6667	5	12.5	8.33333	0	4.16667		20day	11.3889	4.16667		20day	3.41339	2.40563

## Sheet: Figure 5-figure supplement 1H
ectopic swelling of ALM (%)
	Ctrl_ALM	Ctrl_ALM	Ctrl_ALM	Colchicine_ALM	Colchicine_ALM	Colchicine_ALM			Ctrl_ALM	Colchicine_ALM			Ctrl_ALM	Colchicine_ALM
2day	0	9.52381	0	0	0	4.7619		2day	3.1746	1.5873		2day	3.1746	1.5873
4day	0	0	0	0	0	0		4day	0	0		4day	0	0
6day	0	0	0	0	0	0		6day	0	0		6day	0	0
8day	0	0	0	0	0	0		8day	0	0		8day	0	0
10day	0	0	0	4.54545	0	0		10day	0	1.51515		10day	0	1.51515
15day	0	8.33333	0	0	0	0		15day	2.77778	0		15day	2.77778	0
20day	0	0	0	0	0	0		20day	0	0		20day	0	0

## Sheet: Figure 5-figure supplement 1I
Beaded PLM (%)								mean percentage				SEM
	Ctrl_PLM	Ctrl_PLM	Ctrl_PLM	Colchicine_PLM	Colchicine_PLM	Colchicine_PLM			Ctrl_PLM	Colchicine_PLM			Ctrl_PLM	Colchicine_PLM
2day	95.2381	80.9524	52.1739	80	42.8571	66.6667		2day	76.1215	63.1746		2day	12.664	10.8635
4day	40	18.1818	19.0476	56.5217	42.8571	30.4348		4day	25.7431	43.2712		4day	7.13281	7.5335
6day	40	10	4.7619	25	8.33333	15.5556		6day	18.254	16.2963		6day	10.9777	4.82549
8day	9.52381	20	22.7273	4.54545	20	22.7273		8day	17.417	15.7576		8day	4.02437	5.66107
10day	4.16667	43.4783	17.3913	4.54545	13.6364	19.0476		10day	21.6787	12.4098		10day	11.549	4.2311
15day	40	12.5	43.4783	25	8.69565	4.34783		15day	31.9928	12.6812		15day	9.79796	6.286
20day	25	20	20.8333	25	20	37.5		20day	21.9444	27.5		20day	1.5466	5.20416

## Sheet: Figure 5-figure supplement 1J
somatic outgrowth of PLM (%)
	Ctrl_PLM	Ctrl_PLM	Ctrl_PLM	Colchicine_PLM	Colchicine_PLM	Colchicine_PLM			Ctrl_PLM	Colchicine_PLM			Ctrl_PLM	Colchicine_PLM
2day	0	0	0	0	0	0		2day	0	0		2day	0	0
4day	0	0	0	0	0	0		4day	0	0		4day	0	0
6day	0	0	2.38095	0	0	2.22222		6day	0.793651	0.740741		6day	0.793651	0.740741
8day	0	0	0	0	0	0		8day	0	0		8day	0	0
10day	4.16667	4.34783	0	0	0	0		10day	2.83816	0		10day	1.42005	0
15day	10	0	0	5	0	4.34783		15day	3.33333	3.11594		15day	3.33333	1.5693
20day	8.33333	15	0	8.33333	0	0		20day	7.77778	2.77778		20day	4.33903	2.77778

## Sheet: Figure 5-figure supplement 1L
defective neurons at 5DA (%)						mean					SEM
bus-17 ctrl ALM	bus-17 paclitaxel ALM	bus-17 ctrl PLM	bus-17 paclitaxel PLM			bus-17 ctrl ALM	bus-17 paclitaxel ALM	bus-17 ctrl PLM	bus-17 paclitaxel PLM		bus-17 ctrl ALM	bus-17 paclitaxel ALM	bus-17 ctrl PLM	bus-17 paclitaxel PLM
40	92	16	20			40	89.3333	13.3333	14.6667		2.3094	2.66667	4.8074	2.66667
44	92	20	12
36	84	4	12
