# Supplementary material for: Neuroprotective role of Hippo signaling by microtubule stability control in Caenorhabditis elegans
Source: eLife. 2025 Apr 3;13:RP102001. doi: 10.7554/eLife.102001 (PMC11968107; doi:10.7554/eLife.102001)
Supplement: Figure 5—source data 1. [file elife-102001-fig5-data1.xlsx]

## Sheet: FIgure 5C, D
mean percentage of defective neurons at L4 stage				SEM
Ctrl				Ctrl
	ALM	PLM			ALM	PLM
2d	7.66046	5.93513		2d	4.15629	3.81075
4d	15.974	48.8961		4d	2.0217	6.98839
6d	41.6667	63.9683		6d	6.00925	8.7215
8d	58.4343	66.6089		8d	6.77389	4.90442
10d	55.7367	65.7005		10d	2.63011	12.5604
15d	61.1232	63.0072		15d	0.732745	3.8991
20d	73.0556	57.5		20d	4.20354	1.73472
Colchicine				Colchicine
	ALM	PLM			ALM	PLM
2d	6.34921	0		2d	4.19961	0
4d	13.5956	3.1746		4d	4.64853	3.1746
6d	20.6481	13.7037		6d	2.24716	5.88455
8d	15.4545	7.87879		8d	3.78485	1.6872
10d	16.8831	10.8947		10d	1.2987	4.28246
15d	15.1449	10.5797		15d	3.76603	1.28814
20d	23.6111	7.22222		20d	1.38889	1.11111

## Sheet: Figure 5E
touch responses per 10 touches					mean touch responses per 10 touches					SEM
Ctrl_2DA	Colchicine_2DA	Ctrl_2DA	Colchicine_2DA		Ctrl_2DA	Colchicine_2DA	Ctrl_2DA	Colchicine_2DA		Ctrl_2DA	Colchicine_2DA	Ctrl_2DA	Colchicine_2DA
9	9	9	6		8.48889	8.51111	6.55556	7.66667		0.12861	0.12861	0.227954	0.174533
8	7	2	7
7	8	6	10
8	7	4	8
8	7	5	6
9	9	6	9
10	10	3	7
8	9	2	8
9	8	0	6
9	8	6	8
6	6	7	8
9	9	7	8
9	7	7	10
9	9	2	7
10	8	7	4
10	10	2	3
10	9	9	6
8	10	8	8
8	6	8	8
9	7	8	6
10	10	9	8
7	8	6	9
10	10	7	3
8	10	6	8
10	9	7	5
10	7	4	9
7	10	6	9
8	10	6	7
5	10	7	8
5	7	3	7
9	9	10	9
9	9	9	7
7	8	7	6
10	9	5	8
10	8	6	8
9	10	7	4
9	10	8	8
9	9	6	10
8	9	10	8
8	9	8	7
10	10	7	10
9	8	8	8
7	10	8	9
8	9	8	9
8	10	7	9
9	9	3	7
8	8	7	9
9	7	5	10
9	8	4	9
9	8	9	7
7	9	6	8
9	9	10	7
9	9	8	9
10	7	6	10
10	10	3	9
7	9	9	8
6	6	8	7
8	9	6	10
10	9	5	6
10	5	6	5
8	10	9	8
9	7	8	4
9	9	3	10
8	10	6	10
9	8	8	8
9	8	9	7
9	7	5	6
6	9	7	6
8	9	6	9
10	10	6	9
9	7	7	8
7	9	10	7
7	9	10	8
7	7	6	9
9	9	9	8
10	9	6	9
9	10	7	10
8	8	8	8
7	6	10	6
8	8	9	10
10	10	5	8
8	8	5	6
6	9	9	7
7	6	7	9
8	8	7	8
9	10	8	4
9	8	6	9
9	8	8	7
9	8	4	7
10	9	4	8

## Sheet: FIgure 5F
Experimental group	Median Lifespan (days)	# animals Died/ Total		chi	P Value	corrected P Value
Ctrl	18	76/100	v.s. muIs35 - 0.1mM Colchicine	2.67	0.102	0.102
0.1mM Colchicine treated	16	75/100	v.s. muIs35 - OP50	2.67	0.102	0.102
Ctrl	21	69/100	v.s. muIs35 - 0.1mM Colchicine	1.52	0.2183	0.2183
0.1mM Colchicine treated	19	76/100	v.s. muIs35 - OP50		0.2183	0.2183
Ctrl	19	75/100	v.s. muIs35 - 0.1mM Colchicine	0.07	0.7893	0.7893
0.1mM Colchicine treated	18	72/100	v.s. muIs35 - OP50	0.07	0.7893	0.7893
