# Supplementary material for: Neuroprotective role of Hippo signaling by microtubule stability control in Caenorhabditis elegans
Source: eLife. 2025 Apr 3;13:RP102001. doi: 10.7554/eLife.102001 (PMC11968107; doi:10.7554/eLife.102001)
Supplement: Figure 6—source data 1. [file elife-102001-fig6-data1.xlsx]

## Sheet: Figure 6C, D
defective ALM (%)									defective PLM (%)
	2day	4day	6day	8day	10day	15day	20day			2day	4day	6day	8day	10day	15day	20day
WT	5	40	35	45	55	65	50		WT	15	70	60	80	80	60	75
tm683	45	60	70	85	75	75	70		tm683	30	55	75	80	75	75	85
tm1411	35	40	55	50	75	75	75		tm1411	15	45	70	80	75	80	95
	2day	4day	6day	8day	10day	15day	20day			2day	4day	6day	8day	10day	15day	20day
WT	10	15	35	45	40	40	35		WT	25	30	35	50	70	55	70
tm683	40	55	65	65	75	55	95		tm683	10	40	70	60	65	70	65
tm1411	25	50	50	55	60	65	60		tm1411	20	45	60	75	55	65	80
	2day	4day	6day	8day	10day	15day	20day			2day	4day	6day	8day	10day	15day	20day
WT	5	45	35	40	50	40	60		WT	10	65	55	55	65	70	60
tm683	35	70	70	65	75	75	75		tm683	20	50	75	85	95	70	80
tm1411	55	65	40	65	55	55	70		tm1411	15	55	75	65	90	65	85
averaged defective ALM (%)									averaged defective PLM (%)
	2day	4day	6day	8day	10day	15day	20day			2day	4day	6day	8day	10day	15day	20day
WT	6.66667	33.3333	35	43.3333	48.3333	48.3333	48.3333		WT	16.6667	55	50	61.6667	71.6667	61.6667	68.3333
tm683	40	61.6667	68.3333	71.6667	75	68.3333	80		tm683	20	48.3333	73.3333	75	78.3333	71.6667	76.6667
tm1411	38.3333	51.6667	48.3333	56.6667	63.3333	65	68.3333		tm1411	16.6667	48.3333	68.3333	73.3333	73.3333	70	86.6667
SEM									SEM
	2day	4day	6day	8day	10day	15day	20day			2day	4day	6day	8day	10day	15day	20day
WT	1.66667	9.27961	0	1.66667	4.40959	8.33333	7.26483		WT	4.40959	12.5831	7.63763	9.27961	4.40959	4.40959	4.40959
tm683	2.88675	4.40959	1.66667	6.66667	0	6.66667	7.63763		tm683	5.7735	4.40959	1.66667	7.63763	8.81917	1.66667	6.00925
tm1411	8.81917	7.26483	4.40959	4.40959	6.00925	5.7735	4.40959		tm1411	1.66667	3.33333	4.40959	4.40959	10.1379	5	4.40959

## Sheet: FIgure 6E
defective neurons at 2DA (%)
Ctrl_ALM	tm683_ALM	tm683 w/ spas rescue_ALM	tm683 w/ Hs rescue_ALM	tm683 w/ K388R_ALM	Ctrl_PLM	tm683_PLM	tm683 w/ spas rescue_PLM	tm683 w/ Hs rescue_PLM	tm683 w/ K388R_PLM
20	48	12	20	40	32	32	16	8	24
16	48	20	20	44	16	24	28	20	32
12	44	24	24	44	24	32	28	20	24
averaged defective neurons at 2DA (%)
Ctrl_ALM	tm683_ALM	tm683 w/ spas rescue_ALM	tm683 w/ Hs rescue_ALM	tm683 w/ K388R_ALM	Ctrl_PLM	tm683_PLM	tm683 w/ spas rescue_PLM	tm683 w/ Hs rescue_PLM	tm683 w/ K388R_PLM
16	46.6667	18.6667	21.3333	42.6667	24	29.3333	24	16	26.6667
SEM
Ctrl_ALM	tm683_ALM	tm683 w/ spas rescue_ALM	tm683 w/ Hs rescue_ALM	tm683 w/ K388R_ALM	Ctrl_PLM	tm683_PLM	tm683 w/ spas rescue_PLM	tm683 w/ Hs rescue_PLM	tm683 w/ K388R_PLM
2.3094	1.33333	3.52767	1.33333	1.33333	4.6188	2.66667	4	4	2.66667

## Sheet: FIgure 6F
defective neurons at 2DA (%)
Ctrl_ALM	tm683_ALM	tm683 w/ mec-4p::SPAS-1_ALM	Ctrl_PLM	tm683_PLM	tm683 w/ mec-4p::SPAS-1_PLM
20	40	20	12	24	12
12	40	20	12	20	12
16	44	16	20	40	20
averaged defective neurons at 2DA (%)
Ctrl_ALM	tm683_ALM	tm683 w/ mec-4p::SPAS-1_ALM	Ctrl_PLM	tm683_PLM	tm683 w/ mec-4p::SPAS-1_PLM
16	41.3333	18.6667	14.6667	28	14.6667
SEM
Ctrl_ALM	tm683_ALM	tm683 w/ mec-4p::SPAS-1_ALM	Ctrl_PLM	tm683_PLM	tm683 w/ mec-4p::SPAS-1_PLM
2.3094	1.33333	1.33333	2.66667	6.1101	2.66667

## Sheet: FIgure 6G
defective neurons at 2DA (%)
Ctrl_ALM	Colchicine treated_ALM	Ctrl_PLM	Colchicine treated_PLM
36	8	20	4
40	12	24	4
32	20	24	4
averaged defective neurons at 2DA (%)
Ctrl_ALM	Colchicine treated_ALM	Ctrl_PLM	Colchicine treated_PLM
36	13.3333	22.6667
SEM
Ctrl_ALM	Colchicine treated_ALM	Ctrl_PLM	Colchicine treated_PLM
2.3094	3.52767	1.33333

## Sheet: Figure 6H
touch responses per 10 touches at 2DA				touch responses per 10 touches at 2DA				SEM
tm683_untreated	tm683_colchicine treated			tm683_untreated	tm683_colchicine treated			tm683_untreated	tm683_colchicine treated
9	9			7.4	8.35556			0.214808	0.138036
10	9
8	10
7	8
10	8
9	10
5	8
7	8
7	10
8	9
10	10
8	10
9	9
7	9
6	7
9	8
10	10
10	8
10	6
9	8
4	8
8	9
9	10
8	9
6	10
10	7
9	8
7	9
10	10
9	10
8	7
4	10
8	8
4	10
7	6
8	10
8	8
4	6
8	9
10	5
10	8
4	4
7	8
7	9
9	8
7	9
7	7
9	9
6	9
9	10
7	8
6	8
7	9
8	7
8	8
7	9
4	10
4	7
8	6
8	6
10	8
10	8
6	9
7	9
7	10
7	8
6	6
4	9
9	10
9	9
5	9
8	8
6	9
9	8
9	6
2	8
10	9
5	6
8	8
7	7
5	8
3	8
7	9
6	9
7	10
9	8
10	8
6	8
1	10
9	8
