# Supplementary material for: Neuroprotective role of Hippo signaling by microtubule stability control in Caenorhabditis elegans
Source: eLife. 2025 Apr 3;13:RP102001. doi: 10.7554/eLife.102001 (PMC11968107; doi:10.7554/eLife.102001)
Supplement: Figure 7—figure supplement 1—source data 1. [file elife-102001-fig7-figsupp1-data1.xlsx]

## Sheet: Figure 7-figure supplement 1A
# of swelling per neuron at L4 (%)											mean
L4440_ALM	elp-1i_ALM	kin-18i_ALM	spas-1i_ALM	unc-33i_ALM	L4440_PLM	elp-1i_PLM	kin-18i_PLM	spas-1i_PLM	unc-33i_PLM		L4440_ALM	elp-1_ALM	kin-18_ALM	spas-1_ALM	unc-33_ALM	L4440_PLM	elp-1_PLM	kin-18_PLM	spas-1_PLM	unc-33_PLM
1	9	4	13	6	4	1	2	6	8		5.525	6.08571	4.93548	5.45714	4.33333	3.6	3.42857	4.12903	3.45714	4
5	0	4	6	9	4	0	6	3	3
2	6	6	3	3	3	7	7	4	7		SEM
6	4	6	3	6	8	2	8	8	3		L4440_ALM	elp-1_ALM	kin-18_ALM	spas-1_ALM	unc-33_ALM	L4440_PLM	elp-1_PLM	kin-18_PLM	spas-1_PLM	unc-33_PLM
6	4	5	6	5	2	6	4	4	7		0.359821	0.483981	0.334199	0.389662	0.290047	0.364797	0.39169	0.46314	0.37201	0.425385
9	5	6	3	5	3	4	0	3	2
9	7	4	5	6	8	1	9	4	1
3	9	7	3	5	2	4	2	1	6
5	7	5	2	4	3	6	4	0	2
6	3	10	3	5	2	5	5	2	6
6	4	6	3	5	6	4	6	4	2
3	2	1	7	5	1	5	2	3	4
8	3	4	5	3	5	2	10	4	8
6	0	4	3	4	0	2	7	1	6
1	4	3	7	1	1	6	0	10	0
3	7	6	6	1	4	3	1	7	3
8	11	4	9	6	6	2	2	2	6
6	11	8	6	1	9	3	4	3	5
4	8	4	7	5	7	2	5	3	1
5	8	4	5	5	4	4	3	2	7
6	7	3	8	4	8	0	3	3	9
11	8	3	8	4	4	3	5	2	3
4	11	4	6	4	1	9	4	3	4
8	6	8	4	1	5	0	0	6	3
2	7	2	6	6	6	1	5	3	2
8	7	5	5	4	2	3	2	4	2
4	8	7	5	5	1	7	5	6	2
7	6	5	4	3	1	3	2	5	0
6	5	4	6	6	2	7	4	1	1
6	4	6	3	5	2	4	7	5	3
6	5	5	4	3	3	5	4	0	3
6	9		6	3	1	3		2	8
7	2		8	4	3	1		4	4
2	9		4	7	4	5		1	2
8	7		9	4	4	0		2	8
6				3	4				3
7					3
5					0
6					5
4					3

## Sheet: Figure 7-figure supplement 1B
# of swelling per neuron at L4 (%)														mean
L4440_ALM	atat-2i_ALM	dlk-1i_ALM	mec-17i_ALM	mig-2i_ALM	ptl-1i_ALM	ptrn-1i_ALM	atat-2i_PLM	dlk-1i_PLM	mec-17i_PLM	mig-2i_PLM	ptl-1i_PLM	ptrn-1i_PLM		L4440_ALM	atat-2_ALM	dlk-1_ALM	mec-17_ALM	mig-2_ALM	ptl-1_ALM	ptrn-1_ALM	atat-2_PLM	dlk-1_PLM	mec-17_PLM	mig-2_PLM	ptl-1_PLM	ptrn-1_PLM
9	4	6	8	8	5	3	9	5	2	2	3	0		6.09259	5.11111	4.66667	8.7963	4.64286	4.03509	4.59649	3.59259	2.73684	3.81818	2.64286	2.52632	2.82456
4	2	5	17	4	7	3	4	0	7	4	4	3
10	6	4	8	5	2	8	4	9	9	3	0	7		SEM
9	4	7	13	4	4	1	0	4	6	5	2	0		L4440_ALM	atat-2_ALM	dlk-1_ALM	mec-17_ALM	mig-2_ALM	ptl-1_ALM	ptrn-1_ALM	atat-2_PLM	dlk-1_PLM	mec-17_PLM	mig-2_PLM	ptl-1_PLM	ptrn-1_PLM
6	9	3	8	5	2	6	0	4	5	0	7	2		0.27251	0.315749	0.225745	0.675044	0.257899	0.315598	0.279701	0.361995	0.288161	0.447282	0.284249	0.328383	0.333135
6	4	6	6	7	1	5	6	5	5	0	3	0
6	4	4	5	8	5	7	11	5	9	9	6	5
6	5	7	9	6	3	5	4	4	9	5	0	3
3	4	6	5	7	5	5	7	2	1	4	6	1
5	5	4	4	5	6	8	2	4	6	3	7	5
6	5	5	18	3	4	4	2	0	6	4	4	0
4	4	6	8	3	3	4	9	0	4	3	3	8
3	6	7	9	5	16	6	1	7	9	4	9	0
8	5	7	19	5	1	2	5	5	14	4	8	0
9	13	6	6	4	6	5	5	0	9	2	0	1
7	4	6	19	5	2	6	6	1	6	6	2	2
7	5	5	7	5	6	7	4	4	8	4	1	8
3	6	4	9	6	5	0	5	5	6	5	3	0
6	2	7	2	2	2	1	2	3	6	2	2	6
6	4	2	8	6	5	1	7	5	0	4	2	6
8	4	4	8	7	1	4	1	4	0	7	1	7
5	11	2	10	5	4	2	3	6	2	2	1	3
6	3	5	6	2	5	5	1	5	1	4	0	3
4	5	7	6	4	6	4	1	2	1	4	5	5
3	2	4	14	6	7	3	4	0	0	3	9	2
6	4	3	15	0	3	7	7	2	0	4	4	3
3	4	6	7	6	4	6	0	3	1	3	1	5
5	3	7	5	6	3	2	0	3	2	3	4	5
4	2	6	7	6	2	4	1	1	3	3	0	2
5	2	5	14	6	3	4	0	4	4	5	0	7
5	3	7	4	2	4	7	4	4	6	0	4	8
5	4	7	0	4	5	3	5	3	0	1	1	4
8	4	5	3	3	4	4	3	4	3	3	2	6
6	3	4	1	1	0	6	2	0	0	1	0	4
8	9	5	14	4	3	6	8	0	2	2	1	4
5	5	0	4	5	7	4	0	1	2	2	5	6
3	2	5	16	4	4	9	2	4	7	0	5	5
6	3	4	4	8	3	3	2	5	0	2	1	2
4	7	4	4	2	6	3	3	3	4	0	4	2
8	5	7	16	5	5	8	3	1	0	0	0	0
6	6	6	8	3	2	4	2	5	2	1	2	3
9	9	2	6	5	4	5	7	2	2	0	0	2
6	8	5	6	4	3	5	1	0	0	4	0	0
6	6	0	11	3	2	6	2	4	6	1	0	3
7	7	4	11	4	1	8	4	3	9	0	1	1
2	5	3	11	1	6	2	5	2	4	0	2	0
8	7	4	12	5	2	6	7	0	0	0	1	0
9	8	4	12	3	3	3	0	5	7	1	0	0
6	8	3	3	5	5	5	5	0	2	0	1	1
9	7	5	16	7	5	8	5	0	0	0	4	0
7	5	4	10	2	6	1	3	3	4	1	3	2
6	4	3	7	5	3	5	2	0	2	7	4	4
9	6	5	19	8	6	5	3	0	1	4	5	0
9	4	3	1	7	4	3	5	2	5	5	1	0
		4	4	2	1	5		0	1	1	0	3
		3		7	5	3		0		1	0	2
		4			3	7		3			0	0

## Sheet: Figure 7-figure supplement 1D
# of swelling per neuron at L4 (%)					mean
wts-1_ALM	wts-1;ptrn-1_ALM	wts-1_PLM	wts-1;ptrn-1_PLM		wts-1_ALM	wts-1;ptrn-1_ALM	wts-1_PLM	wts-1;ptrn-1_PLM
4	2	7	9		6.36364	6.1	4.47727	4.55
9	5	7	3
4	5	5	2		SEM
7	5	5	3		wts-1_ALM	wts-1;ptrn-1_ALM	wts-1_PLM	wts-1;ptrn-1_PLM
6	5	4	10		0.254122	0.341189	0.369973	0.477641
6	5	5	1
6	9	7	9
6	6	1	3
7	3	8	1
8	5	5	2
5	8	9	3
4	8	4	2
7	4	3	8
7	5	1	9
6	9	2	6
5	4	7	6
7	4	9	7
8	9	2	9
4	7	6	5
5	6	8	6
4	5	7	3
7	6	7	6
10	10	4	6
5	4	3	1
5	9	8	0
4	9	5	4
6	9	4	5
6	2	3	10
9	9	3	0
6	5	1	2
8	4	2	3
5	4	2	5
8	6	7	3
7	6	4	10
6	10	2	3
7	6	3	0
5	6	4	7
5	8	2	2
7	6	5	4
11	6	2	4
5		0
9		1
7		7
7		6
