# Supplementary material for: Neuroprotective role of Hippo signaling by microtubule stability control in Caenorhabditis elegans
Source: eLife. 2025 Apr 3;13:RP102001. doi: 10.7554/eLife.102001 (PMC11968107; doi:10.7554/eLife.102001)
Supplement: Figure 7—source data 1. [file elife-102001-fig7-data1.xlsx]

## Sheet: Figure 7B
# of swelling per neuron at L4							average # of swelling per neuron at L4
wts-1_ ALM	wts-1;dlk-1_ALM	wts-1;ptl-1_ALM	wts-1_PLM	wts-1;dlk-1_PLM	wts-1;ptl-1_PLM		wts-1_ ALM	wts-1;dlk-1_ALM	wts-1;ptl-1_ALM	wts-1_PLM	wts-1;dlk-1_PLM	wts-1;ptl-1_PLM
8	6	0	0	2	0		6.13333	2.89333	2.42667	3.25333	1.52	0.773333
8	3	3	5	2	1
8	0	2	3	0	1		SEM
7	4	2	3	4	0		wts-1_ ALM	wts-1;dlk-1_ALM	wts-1;ptl-1_ALM	wts-1_PLM	wts-1;dlk-1_PLM	wts-1;ptl-1_PLM
5	4	1	5	7	0		0.215886	0.250098	0.228724	0.219001	0.185375	0.120917
9	4	0	6	0	0
8	3	2	5	4	2
8	2	0	3	6	0
6	1	0	2	4	0
4	1	2	3	3	1
6	8	6	4	4	3
5	5	0	4	3	0
8	2	3	5	1	0
6	1	4	6	0	0
8	4	3	4	2	0
7	3	3	7	3	1
6	2	1	4	0	0
7	2	0	8	3	0
8	5	2	4	2	1
7	0	0	4	0	0
9	3	3	5	4	4
9	0	2	6	0	1
7	4	3	4	0	1
4	4	3	4	3	1
7	0	2	4	0	1
6	0	2	2	1	1
4	0	6	4	0	0
8	4	1	6	0	0
8	3	3	4	1	0
5	2	3	3	2	0
3	2	5	2	3	1
6	5	3	1	2	3
8	4	0	3	1	2
6	5	7	1	3	0
7	4	1	1	1	1
4	3	2	2	2	0
4	3	3	4	0	2
4	2	6	3	0	0
5	3	1	1	0	0
8	2	2	0	1	0
7	1	8	6	0	0
7	4	3	1	0	1
5	5	9	2	1	0
2	3	3	2	3	0
5	7	0	0	1	2
5	1	4	2	0	0
6	9	2	4	1	1
8	0	1	2	0	3
6	2	0	4	3	2
5	1	0	4	0	4
5	6	2	1	4	1
8	8	3	4	0	1
3	0	1	1	2	0
8	1	3	5	2	1
4	0	1	2	4	1
10	4	1	1	0	0
6	4	1	2	1	0
7	2	2	4	3	1
5	3	5	2	0	2
3	3	4	6	2	0
4	3	0	0	1	0
5	2	3	7	0	0
7	3	1	3	1	0
7	0	4	5	0	0
10	2	3	5	1	1
7	1	5	4	0	3
6	3	0	0	0	0
7	8	3	4	1	0
7	6	3	1	0	0
2	4	0	3	0	0
6	5	4	3	2	0
6	0	3	3	1	0
2	1	4	1	3	1
4	2	4	5	0	3
4	0	0	0	3	2

## Sheet: Figure 7C
intact neurons at L4 (%)							average intact neurons at L4 (%)
wts-1_ ALM	wts-1;dlk-1_ALM	wts-1;ptl-1_ALM	wts-1_PLM	wts-1;dlk-1_PLM	wts-1;ptl-1_PLM		wts-1_ ALM	wts-1;dlk-1_ALM	wts-1;ptl-1_ALM	wts-1_PLM	wts-1;dlk-1_PLM	wts-1;ptl-1_PLM
0	16	28	4	32	52		0	16	20	6.66667	37.3333	53.3333
0	12	16	4	40	52
0	20	16	12	40	56		SEM
							wts-1_ ALM	wts-1;dlk-1_ALM	wts-1;ptl-1_ALM	wts-1_PLM	wts-1;dlk-1_PLM	wts-1;ptl-1_PLM
							0	2.3094	4	2.66667	2.66667	1.33333

## Sheet: Figure 7E
defective neurons at L4 (%)
ptl-1_ALM	ptl-1; yap-1_ALM	ptl-1_PLM	ptl-1; yap-1_PLM
40	75	20	30
35	75	0	25
50	80	0	20
intact neurons at L4 (%)						average intact neurons at L4 (%)
ptl-1_ALM	ptl-1; yap-1_ALM	ptl-1_PLM	ptl-1; yap-1_PLM			ptl-1_ALM	ptl-1; yap-1_ALM	ptl-1_PLM	ptl-1; yap-1_PLM
60	25	80	70			58.3333	23.3333	93.3333	75
65	25	100	75
50	20	100	80			SEM
						ptl-1_ALM	ptl-1; yap-1_ALM	ptl-1_PLM	ptl-1; yap-1_PLM
						4.40959	1.66667	6.66667	2.88675
