# Supplementary material for: Neuroprotective role of Hippo signaling by microtubule stability control in Caenorhabditis elegans
Source: eLife. 2025 Apr 3;13:RP102001. doi: 10.7554/eLife.102001 (PMC11968107; doi:10.7554/eLife.102001)
Supplement: Supplementary file 1. [file elife-102001-supp1.xlsx]

## Sheet: Sheet1
Strain	Genotype	Source
LJ750	muIs35	this study (muIs35 was isolated from CF1192)
CF702	muIs32	CGC
LJ770	wts-1(ok753) I; muIs35(Pmec-7::GFP); Ex Popt-2::wts-1::GFP	this study
LJ2450	N2: Ex Pdat-1::GFP, Punc-122::RFP	this study
LJ2451	wts-1(ok753) I; Ex Popt-2::wts-1::GFP, Pdat-1::GFP, Punc-122::RFP	this study
LJ2452	N2; Ex Punc-47::GFP, Punc-122::RFP	this study
LJ2453	wts-1(ok753) I; Ex Popt-2::wts-1::GFP, Punc-47::GFP, Punc-122::RFP	this study
LJ785	N2; Ex Pcho-1::GFP, pRF4	this study
LJ786	wts-1(ok753) I; Ex Popt-2::wts-1::GFP, Pcho-1::GFP, pRF4	this study
LJ771	wts-1(ok753) I; yap-1(tm1416) X; muIs35(Pmec-7::GFP)	this study
LJ773	wts-1(ok753) I; egl-44(ys41) II; muIs35(Pmec-7::GFP)	this study
LJ2479	muIs35(Pmec-7::GFP); Ex Punc-122::RFP	this study
LJ2470	muIs35(Pmec-7::GFP); Ex Popt-2::wts-1::GFP, Pmec-4::wts-1(sas1), Punc-122::RFP line1	this study
LJ2471	muIs35(Pmec-7::GFP); Ex Popt-2::wts-1::GFP, Pmec-4::wts-1(sas1), Punc-122::RFP line2	this study
LJ2473	muIs35(Pmec-7::GFP); Ex Popt-2::wts-1::GFP, Pmec-4::wts-1(sas1), Punc-122::RFP line3	this study
LJ2474	muIs35(Pmec-7::GFP); Ex Popt-2::wts-1::GFP, Pmec-4::wts-1(sas2), Punc-122::RFP line1	this study
LJ2475	muIs35(Pmec-7::GFP); Ex Popt-2::wts-1::GFP, Pmec-4::wts-1(sas2), Punc-122::RFP line2	this study
LJ2476	muIs35(Pmec-7::GFP); Ex Popt-2::wts-1::GFP, Pmec-4::wts-1(sas2), Punc-122::RFP line3	this study
LJ779	wts-1(ok753) I; yap-1(tm1416) X; muIs35(Pmec-7::GFP); Ex Pmec-4::GFP::yap-1, Pmyo-2::mCherry	this study
LJ2483	muIs35(Pmec-7::GFP); Ex Pmec-4::GFP::yap-1(1ng/ul), Punc-122::RFP line1	this study
LJ2484	muIs35(Pmec-7::GFP); Ex Pmec-4::GFP::yap-1(1ng/ul), Punc-122::RFP line2	this study
LJ2485	muIs35(Pmec-7::GFP); Ex Pmec-4::GFP::yap-1(1ng/ul), Punc-122::RFP line3	this study
LJ2486	muIs35(Pmec-7::GFP); Ex Pmec-4::GFP::yap-1(10ng/ul), Punc-122::RFP line1	this study
LJ2487	muIs35(Pmec-7::GFP); Ex Pmec-4::GFP::yap-1(10ng/ul), Punc-122::RFP line2	this study
LJ2488	muIs35(Pmec-7::GFP); Ex Pmec-4::GFP::yap-1(10ng/ul), Punc-122::RFP line3	this study
LJ2489	muIs35(Pmec-7::GFP); Ex Pmec-4::GFP::yap-1(50ng/ul), Punc-122::RFP line1	this study
LJ2490	muIs35(Pmec-7::GFP); Ex Pmec-4::GFP::yap-1(50ng/ul), Punc-122::RFP line2	this study
LJ2491	muIs35(Pmec-7::GFP); Ex Pmec-4::GFP::yap-1(50ng/ul), Punc-122::RFP line3	this study
LJ2492	muIs35(Pmec-7::GFP); Ex Pmec-4::GFP::yap-1(100ng/ul), Punc-122::RFP line1	this study
LJ2493	muIs35(Pmec-7::GFP); Ex Pmec-4::GFP::yap-1(100ng/ul), Punc-122::RFP line2	this study
LJ2494	muIs35(Pmec-7::GFP); Ex Pmec-4::GFP::yap-1(100ng/ul), Punc-122::RFP line3	this study
CB7431	bus-17(br2) X	CGC
LJ2429	bus-17(br2) X; muIs35(Pmec-7::GFP)	this study
LJ2430	wts-1(ok753) I; bus-17(br2)X; muIs35(Pmec-7::GFP); Ex Popt-2::wts-1::GFP	this study
FX683	spas-1(tm683) V	CGC
LJ2401	spas-1(tm683) V; muIs32(Pmec-7::GFP)	this study
RB1411	spas-1(ok1608) V	CGC
LJ2400	spas-1(ok1608) V; muIs32(Pmec-7::GFP)	this study
LJ2403	muIs35; Ex Pspas-1::spas-1(c)::mCherry, pRF4	this study
LJ2412	spas-1(tm683) V; muIs32(Pmec-7::GFP); Ex Pmyo-3::mCherry	this study
LJ2408	spas-1(tm683) V; muIs32(Pmec-7::GFP); Ex Pspas-1::spas-1(c)::mCherry(10ng/ul), Pmyo-3::mCherry	this study
LJ2420	spas-1(tm683) V; muIs32(Pmec-7::GFP); Ex Pspas-1::hSPAST(c)::mCherry(10ng/ul), Pmyo-3::mCherry	this study
LJ2423	spas-1(tm683) V; muIs32(Pmec-7::GFP); Ex Pspas-1::hSPAST(K388R)::mCherry(10ng/ul), Pmyo-3::mCherry	this study
LJ2413	spas-1(tm683) V; muIs32(Pmec-7::GFP); Ex Pmec-4::spas-1(c)::mCherry(1ng/ul), Pmyo-3::mCherry	this study
KP3948	eri-1(mg366) IV; lin-15B(n744) X	CGC
LJ2432	wts-1(ok753) I; eri-1(mg366) IV; muIs35(Pmec-7::GFP); Ex Popt-2::wts-1::gfp	this study
KU12	dlk-1(km12) I	CGC
LJ2440	dlk-1(km12) I; muIs35(Pmec-7::GFP)	this study
LJ2434	wts-1(ok753) dlk-1(km12) I; muIs35(Pmec-7::GFP); Ex Popt-2::wts-1::GFP	this study
RB809	ptl-1(ok621) III	CGC
LJ2441	ptl-1(ok621) III; muIs35(Pmec-7::GFP)	this study
LJ2433	wts-1(ok753) I; ptl-1(ok621) III; muIs35(Pmec-7::GFP); Ex Popt-2::wts-1::GFP	this study
LJ2444	ptl-1(ok621) III; yap-1(tm1416) X; muIs35(Pmec-7::GFP)	this study
	ptrn-1(tm5597) X	NBRP
LJ2445	wts-1(ok753) I; ptrn-1(tm5597) X; muIs35(Pmec-7::GFP); Ex Popt-2::wts-1::GFP	this study
	* The final concentration of each transgene was 50 ng/μL, unless otherwise noted.
	* For sas constructs, the final concentration of each sense or antisense construct was 100 ng/μL.
	* The final concentration of Pmyo-2::mCherry, Pmyo-3::mCherry, or Punc-122::RFP was 10 ng/μL.
